# Supplementary material
Source: Research Square preprint supplement (doi:10.21203/rs.3.rs-12088/v5)
Supplement: Supplementary file 1 [file 9f0946d52791270f2054c089.docx]

| Parameters in relation to development of Complicated Appendicitis ABSENT=1,PRESENT=2(1) | | df | Significance (p) | Exp(B) | 95% C.I.for EXP(B) | |
| --- | --- | --- | --- | --- | --- | --- |
| Lower | Upper |
|  | DURATION OF PAIN | 1 | .957 | .955 | .177 | 5.157 |
| CRP: <0.6=1 >0.6=2(1) | 1 | .547 | 1.783 | .272 | 11.705 |
| APPENDIX: <7.6mm=1 >7.6mm=2(1) | 1 | .689 | 1.620 | .153 | 17.110 |
| Hyperbilirubinemia | 1 | .000 | .010 | .001 | .114 |
| Constant | 1 | 1.000 | .000 |  |  |
