# Supplementary material
Source: Research Square preprint supplement (doi:10.21203/rs.3.rs-12088/v5)
Supplement: Supplementary file 2 [file b185215c76b1ce0fde0822ca.docx]

| **TYPE OF BILIRUBIN** | **TYPE OF APPENDICITIS** | | NUMBER OF CASES | MEAN | SD | t | df | P VALUE |
| --- | --- | --- | --- | --- | --- | --- | --- | --- |
| TOTAL | Uncomplicated | | 75 | 0.79 | 0.16 | 14.63 | 108 | 0.001 |
| Complicated | | 35 | 1.39 | 0.26 |
| DIRECT | Uncomplicated | | 75 | 0.43 | 0.1 | 12.73 | 108 | 0.016 |
| Complicated | | 35 | 0.72 | 0.13 |
| INDIRECT | Uncomplicated | | 75 | 0.36 | 0.08 | 13.65 | 108 | 0.021 |
| Complicated | | 35 | 0.66 | 0.14 |
| TOTAL BILIRUBIN LEVEL | (N=110) | | MEAN | SD | t | df | P value | |
| PRE-OPERATIVE  (mean) | Complicated appendicitis(n=35) | 1.39 | 0.98 | 0.346 | 8.85 | 109 | <0.05 | |
| Uncomplicated appendicitis(n=75) | 0.69 |
| POST-OPERATIVE on Day 7  (mean) | Complicated appendicitis(n=35) | 0.79 | 0.69 | 0.104 |
| Uncomplicated appendicitis(n=75) | 0.69 |

| **SERUM TOTAL BILIRUBIN LEVEL** | | | | | |
| --- | --- | --- | --- | --- | --- |
| **COMPLICATION** | **< 1mg/dl** | **>1mg/dl** | **TOTAL** | **Χ2,df** | **P VALUE** |
| **ABSENT** | 66 | 9 | 75 | 64.39,1 | <0.05 |
| **PRESENT** | 3 | 32 | 35 |
| **TOTAL** | 69 | 41 | 110 |
